# Supplementary material for: Differential effects of garcinol and curcumin on histone and p53 modifications in tumour cells
Source: Springer Nature journal article supplement (doi:10.1186/1471-2407-13-37), 2013-01-29

**A**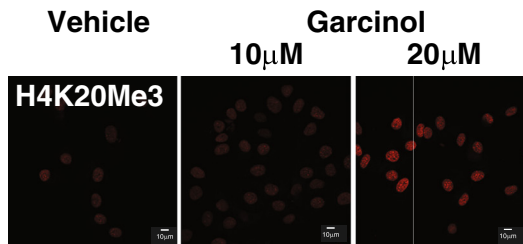**B**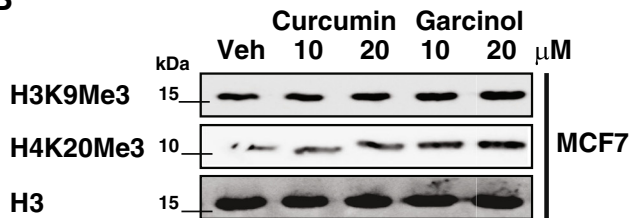**C**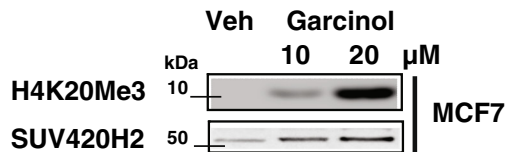**D**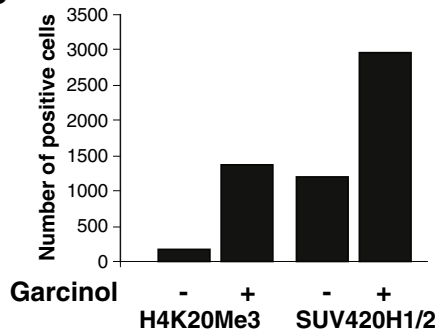**E**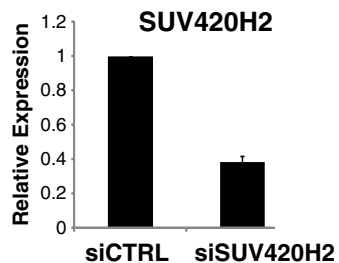**F**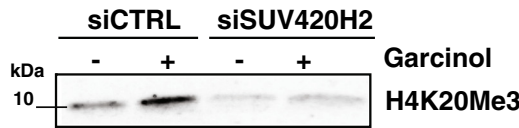

Supplement: 12885_2012_3691_MOESM4_ESM.pdf [file 12885_2012_3691_MOESM4_ESM.pdf]
